# Supplementary material
Source: HighWire-hosted journal article supplement (https://www.highwirestage.com/highwire/filestream/61917/field_highwire_adjunct_files/0/18-00160.pdf)
Supplement: 18-00160.pdf [file 18-00160.pdf]

**On-line Table: Patient and facility characteristics for pediatric noncontrast head CT examinations**

| Characteristics                 | Facilities <sup>a</sup><br>(No.) (%) | Examinations<br>(No.) (%) | CTDI <sub>vol</sub><br>(mGy) (Median) (IQR) | DLP (mGy × cm)<br>(Median) (IQR) |
|---------------------------------|--------------------------------------|---------------------------|---------------------------------------------|----------------------------------|
| Overall                         | 966 (100)                            | 295,296 (100)             | 33 (22–47)                                  | 543 (357–758)                    |
| Patient age (yr)                |                                      |                           |                                             |                                  |
| 0–2                             | 633 (66)                             | 62,933 (21.3)             | 20 (14–26)                                  | 294 (203–402)                    |
| 3–6                             | 670 (69)                             | 38,144 (12.9)             | 25 (20–34)                                  | 411 (312–556)                    |
| 7–10                            | 727 (75)                             | 38,847 (13.1)             | 31 (24–41)                                  | 507 (394–668)                    |
| 11–14                           | 836 (87)                             | 58,091 (19.7)             | 37 (28–49)                                  | 617 (472–800)                    |
| 15–18                           | 894 (93)                             | 97,281 (33.0)             | 46 (35–55)                                  | 743 (576–912)                    |
| Sex                             |                                      |                           |                                             |                                  |
| Female                          | 910 (94)                             | 129,814 (44.0)            | 33 (23–47)                                  | 543 (357–752)                    |
| Male                            | 917 (95)                             | 165,482 (56.0)            | 32 (22–46)                                  | 544 (358–765)                    |
| Facility type <sup>b</sup>      |                                      |                           |                                             |                                  |
| Academic                        | 103 (11)                             | 53,607 (18.1)             | 32 (22–46)                                  | 535 (346–756)                    |
| Community                       | 533 (55)                             | 136,694 (46.3)            | 40 (27–52)                                  | 645 (435–848)                    |
| Multispecialty clinic           | 41 (4)                               | 3975 (1.3)                | 44 (28–54)                                  | 692 (416–980)                    |
| Freestanding center             | 251 (26)                             | 7138 (2.4)                | 44 (30–51)                                  | 672 (461–842)                    |
| Children's hospital             | 29 (3)                               | 92,683 (31.4)             | 26 (19–33)                                  | 429 (297–445)                    |
| Other                           | 9 (1)                                | 1199 (0.5)                | 36 (26–53)                                  | 599 (453–906)                    |
| Trauma designation <sup>b</sup> |                                      |                           |                                             |                                  |
| I                               | 122 (13)                             | 130,536 (44.2)            | 27 (20–39)                                  | 460 (308–663)                    |
| II                              | 104 (11)                             | 62,240 (21.1)             | 32 (22–46)                                  | 538 (365–758)                    |
| III                             | 69 (7)                               | 18,033 (6.1)              | 45 (32–59)                                  | 718 (517–954)                    |
| IV                              | 31 (3)                               | 3932 (1.3)                | 46 (34–54)                                  | 772 (575–920)                    |
| Not applicable                  | 640 (66)                             | 80,553 (27.3)             | 40 (27–51)                                  | 637 (444–820)                    |
| Facility location <sup>b</sup>  |                                      |                           |                                             |                                  |
| Metropolitan                    | 404 (42)                             | 194,155 (65.7)            | 30 (21–42)                                  | 497 (323–696)                    |
| Suburban                        | 383 (40)                             | 75,917 (25.7)             | 41 (27–51)                                  | 642 (429–828)                    |
| Rural                           | 179 (18)                             | 25,224 (8.6)              | 41 (28–57)                                  | 653 (453–892)                    |
| Census region                   |                                      |                           |                                             |                                  |
| Northeast                       | 242 (25)                             | 75,295 (25.5)             | 32 (22–45)                                  | 516 (343–719)                    |
| Midwest                         | 264 (27)                             | 59,820 (20.2)             | 39 (26–51)                                  | 639 (416–849)                    |
| South                           | 304 (32)                             | 126,874 (43.0)            | 30 (22–44)                                  | 510 (343–716)                    |
| West                            | 150 (16)                             | 32,791 (11.3)             | 33 (22–47)                                  | 575 (374–801)                    |
| Average monthly examinations    |                                      |                           |                                             |                                  |
| 0–100                           | 948 (98.1)                           | 208,908 (70.7)            | 37 (25–50)                                  | 600 (396–818)                    |
| 101–200                         | 15 (1.6)                             | 63,447 (21.5)             | 26 (18–34)                                  | 443 (286–612)                    |
| 201–300                         | 2 (0.2)                              | 10,403 (3.5)              | 24 (17–29)                                  | 387 (258–491)                    |
| >300                            | 1 (0.1)                              | 12,538 (4.3)              | 27 (22–38)                                  | 446 (334–637)                    |

**Note:**—mGy indicates that 1 gray is 1 joule of radiation energy per 1 kg of matter.

<sup>a</sup> Percentages for age and sex categories do not add up to 100% because a facility can have examinations from >1 age group and sex.

<sup>b</sup>  $P < .0001$  for comparison of median CTDI<sub>vol</sub> among categories for each variable.

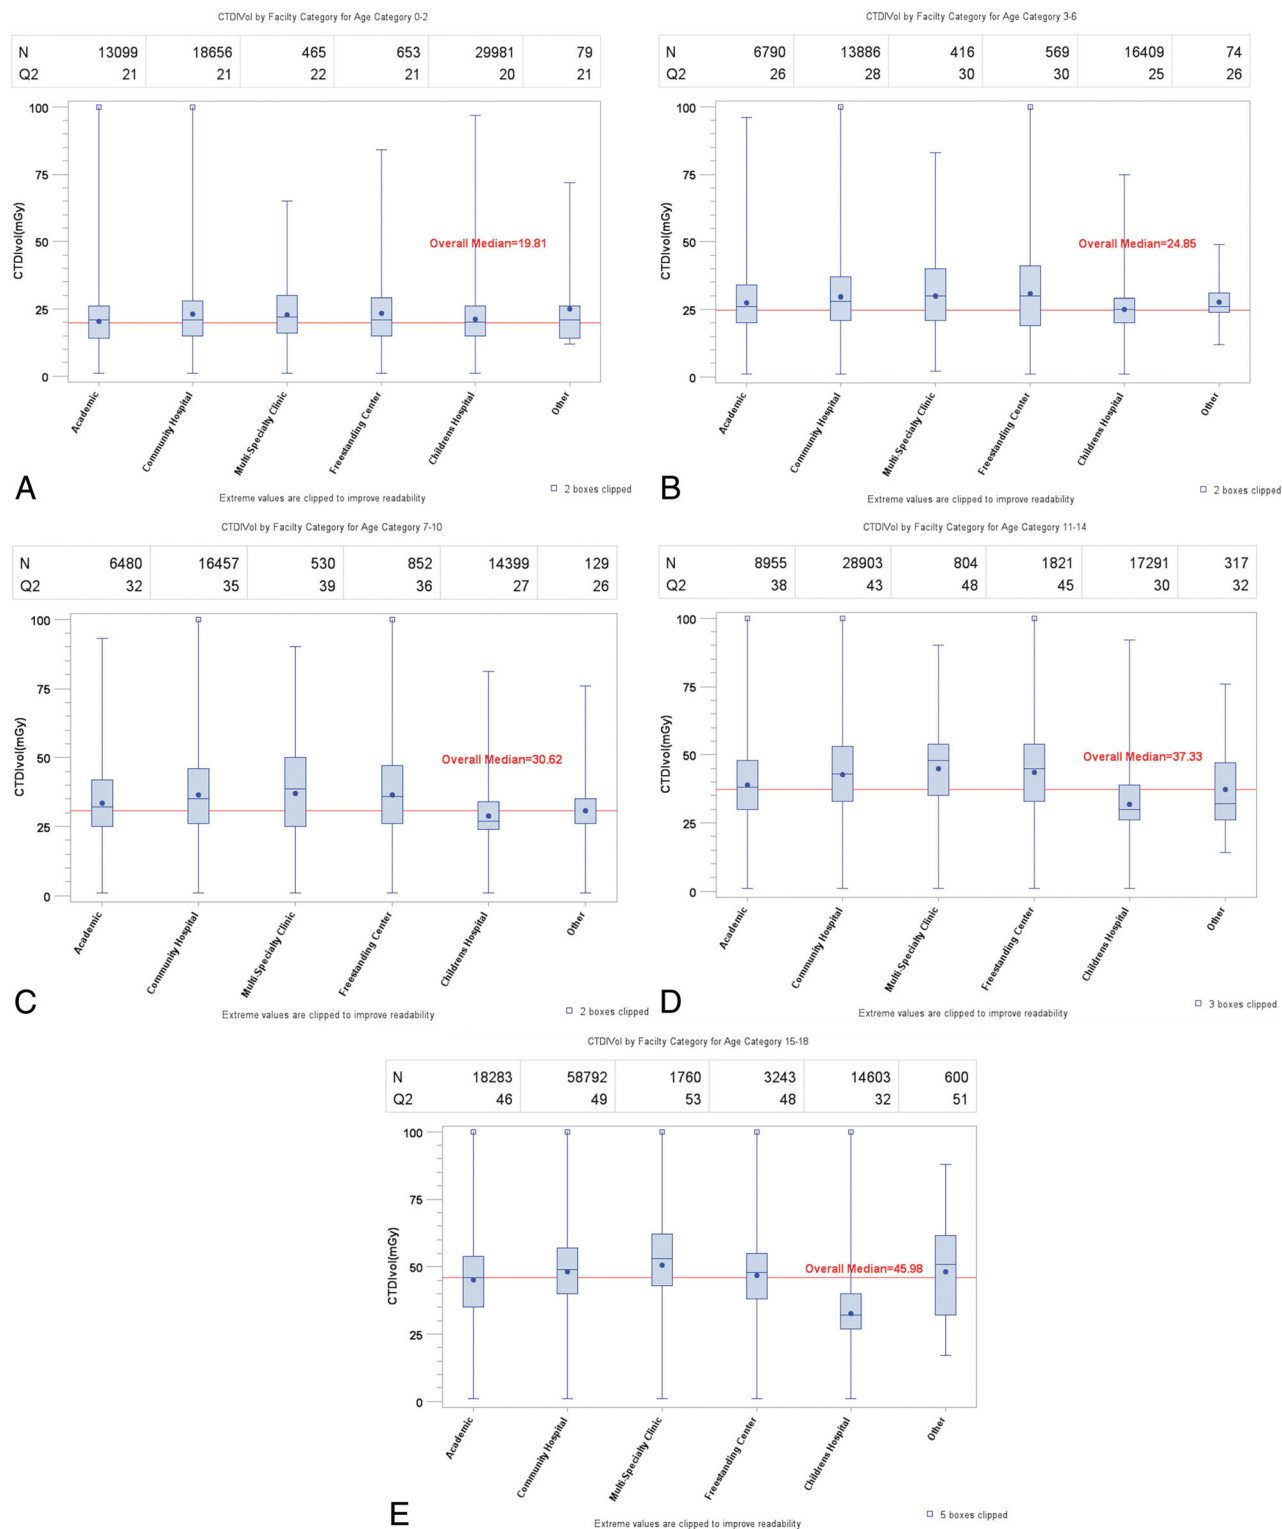

**ON-LINE FIGURE.** Boxplot distribution of CTDI<sub>vol</sub> for each age category by hospital type: 0–2 years (A), 3–6 years (B), 7–11 years (C), 11–14 years (D), 15–18 years (E). The horizontal line represents the overall median CTDI<sub>vol</sub> for all examinations in the age category. For each box, the horizontal line represents the hospital median CTDI<sub>vol</sub> and the dot represents the mean CTDI<sub>vol</sub>; the upper and lower edges of the box represent the upper and lower quartiles, respectively. The number of examinations for each hospital type (N) and the median CTDI<sub>vol</sub> (Q2) are provided in the Table above the boxplots.
